# Supplementary material for: Novel nanostructural contrast for magnetic resonance imaging of endothelial inflammation: targeting SPIONs to vascular endothelium
Source: Royal Society of Chemistry journal article supplement (doi:10.1039/c6ra10994b), 2016-01-01

**Figure S1.** Hydrodynamic diameter distribution profiles obtained from DLS measurements for SPION-CCh (black dotted line) and SPION-CCh-Ts (red solid line).

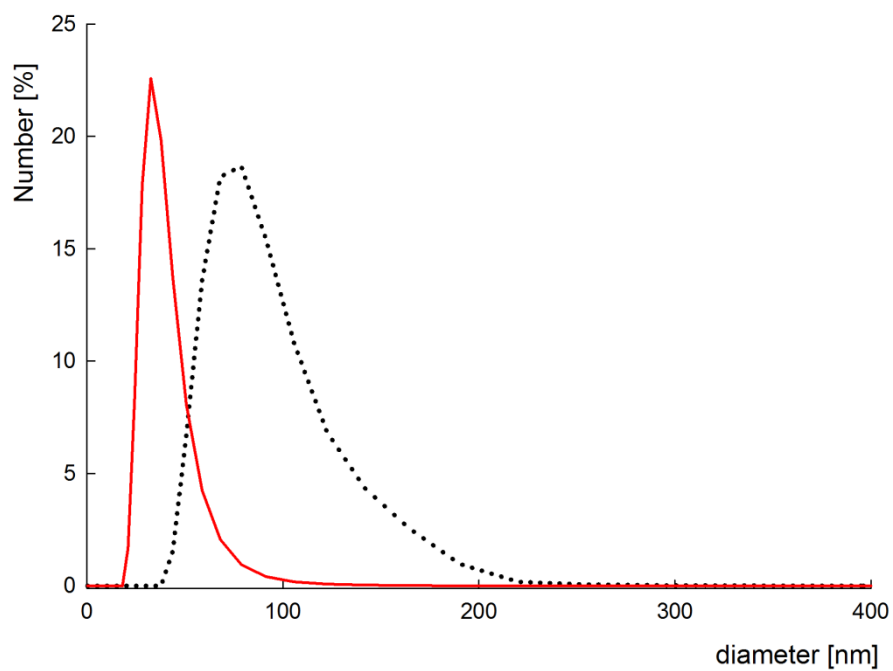

**Figure S2.** The magnetization loops for dried SPION-CCh-anti-VCAM-1 sample at selected temperatures.

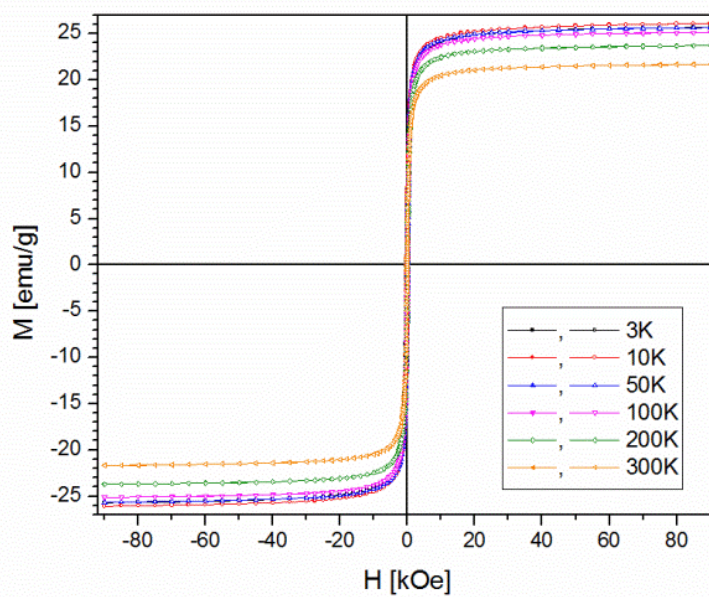

**Figure S3.** Fluorescence images of the samples obtained by immunostaining of the frozen aortic rings of the diabetic db/db mice with endothelial dysfunction: control sample (A) and sample preincubated with anti-P-selectin antibodies (B).

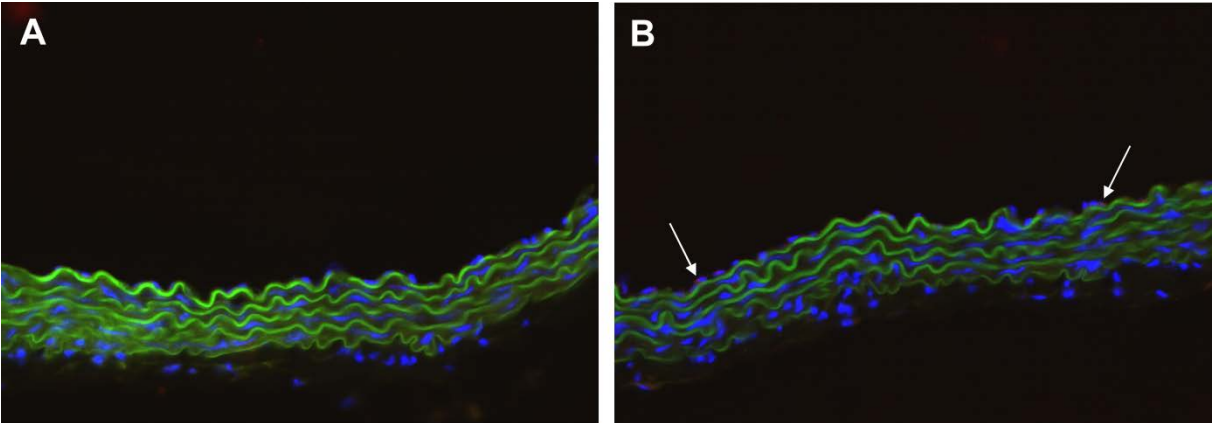

Supplement: c6ra10994b1.pdf [file c6ra10994b1.pdf]
